# Supplementary material for: T-Cell Therapy: Options for Infectious Diseases
Source: PubMed Central journal article supplement — Clin Infect Dis. 2015 Sep 16;61(Suppl 3):S217–24. doi: 10.1093/cid/civ615 (PMC4583575; doi:10.1093/cid/civ615), 2015-09-16
Supplement: supp_civ615_civ615supp.pdf [file supp_civ615_civ615supp.pdf]

## Supplementary Data Set

### T-CELL THERAPY: OPTIONS FOR INFECTIOUS DISEASES

Shreemanta K Parida<sup>1</sup>, Thomas Poiret<sup>1,2</sup>, Liu Zhenjiang<sup>1</sup>, Qingda Meng<sup>1</sup>, Jan Heyckendorf<sup>3</sup>,  
Christoph Lange<sup>3,4,5</sup>, Aditya S Ambati<sup>1,2,5</sup>, Martin V Rao<sup>1</sup>, Davide Valentini<sup>1,2</sup>, Giovanni  
Ferrara<sup>5</sup>, Elena Rangelova<sup>6</sup>, Ernest Dadoo<sup>1,7</sup>, Alimuddin Zumla<sup>8</sup>, Markus Maeurer<sup>1,2</sup>

<sup>1</sup>Therapeutic Immunology Division, Dept of Laboratory Medicine, Karolinska Institutet, <sup>2</sup>Centre for Allogeneic Stem Cell Transplantation (CAST), Karolinska University Hospital, <sup>3</sup>Division of Clinical Infectious Diseases, German Center for Infection Research, Research Center Borstel, Germany, <sup>4</sup>International Health / Infectious Diseases, University of Lübeck, Germany, <sup>5</sup>Department of Medicine, Karolinska Institutet, <sup>6</sup>Pancreatic Surgery Unit, Division of Surgery, Department of Clinical Science, Intervention and Technology (CLINTEC), Stockholm, Sweden, <sup>7</sup>Dept of Neurosurgery, Karolinska University Hospital, Stockholm, Sweden, <sup>8</sup>Department of Infection, Division of Infection and Immunity, Centre for Clinical Microbiology, University College London, and NIHR Biomedical Research Centre, University College London Hospitals, London, United Kingdom.

**Correspondence:** Prof. Markus Maeurer, Therapeutic Immunology, F79, LabMed, Hälsovägen, Karolinska University Hospital, Huddinge, SE-14186 Huddinge, Sweden. Email: [markus.maeurer@ki.se](mailto:markus.maeurer@ki.se)

## Donor Lymphocyte Infusion

Adoptive transfer of CMV-specific CD8+ T-cells generated from CMV seropositive MHC identical bone marrow donors and expanded *in vitro* during 5-12 weeks showed a successful reconstitution of the CMV-specific immune responses in DLI-treated patients. *In vitro* selection/expansion and technologies turned the DLI into a more specific adoptive T-cell therapy. *Ex vivo* stimulation of peripheral blood mononuclear cells against target antigens to select specific T-cell population have been used to treat CMV [1] infections following HSCT. EBV-specific cytotoxic T-cells (CTL) lines were successfully established from donor leucocytes and infused into allograft recipients to treat patients with (EBV+) PTLD. The EBV-specific T-cells were prepared by stimulating the donor lymphocytes with EBV transformed B-cells from donors. After infusion, specific T-cells persisted for 10 weeks in this study [2]. The same group studied 114 patients receiving infusions of EBV-specific cytotoxic T lymphocytes to prevent or treat PTLD [3]. None of the patients (101) developed PTLD who received EBV specific T-cells in the prevention setting, whereas 11 of 13 patients treated with CTLs for biopsy-proven or probable PTLD achieved sustained complete remissions. The toxicity was described as minimal, consisting mainly of localized swelling at the sites of responsive disease and the study demonstrated the persistence of functional CTLs for up to 9 years. The same protocol for generation of the EBV-CTLs was used to treat the patients with locoregional (EBV+) nasopharyngeal carcinoma (NPC), 62% (5/8) relapsed patients remain disease free (at 17-75 months) [4]. The EBV-CTL lines in this study were predominantly CD3+ CD8+ T-cells (mean, 83.2%). EBV-specific T-cell therapy has not shown similar efficiency in patients after solid organ transplant due to the lifelong immunosuppression. This may change since Ricciardelli and coworkers recently generated EBV-specific T-cell lines resistant to immunosuppressive treatment [5].

## **Advances in adoptive T-cell technology**

The last 10 years witnessed new approaches in establishing clinically relevant T-cell products for therapy. For instance, an Ad5f35pp65 vector was successfully used to create T-cells specific for CMV, EBV and several serotypes of adenovirus from a single cell culture [6]. Feasible use of banked third-party virus-specific T-cell (VST) lines was demonstrated by the same group to treat severe viral infections after HSCT. The use of anti-viral directed T-cell products showed 74% complete or partial responses [7]. Following *in vitro* stimulation and expansion, the isolation of virus specific T-cell population can be assessed by class I or II multimers coupled with magnetic beads: The first trial using multimers in adoptive therapy was demonstrated 10 years ago [8]: Patients received purified CMV-specific CD8<sup>+</sup> T-cells using HLA class I-peptide tetramers. All patients had a reduction of their CMV viral load and some patients experienced clearance of CMV infection. Similarly, streptamer [9]-selected pp65-specific CD8<sup>+</sup> effector T-cells were infused into patients with CMV-drug resistant strains [10]. CMV was cleared after a single infusion of a pp65 specific cells dose <1 million/kg. HLA-A2 multimers have also been used in the context of PTLD [11] and adenovirus (HAdV)-specific CD8<sup>+</sup> T-cell targets [12]. Therefore multimers have shown successful results, yet the technology is limited by the HLA-restriction, GMP (Good-manufacturing practice)-related issues, and the availability of potential donors with reactive T-cells against the virus in sufficient numbers.

Unlike multimers, IFN- $\gamma$  capture T-cell technology and magnetic bead-mediated selection does not have HLA-restriction. It has first proven its efficiency by adoptive transfer of HAdV specific T-cells [13-15]. The same technology has shown its efficiency to select EBV specific T-

cells using EBNA-1 antigen in order to treat PTLD patients after HSCT [16], it was also used for the transfer of CMV-pp65-specific T-cells in a prevention setting. [17]. Low numbers of (differentiated effector-memory) CMV-specific T-cells predominantly CD4+ (81% of the products) showed a clinically relevant effect, which was independently confirmed in a different study [18]. In both studies, patients were treated preemptively with antiviral drugs (ganciclovir, foscarnet and valganciclovir); adoptive T-cell therapy is not yet able to be used as single therapy and acts effectively as adjunct treatment in anti-viral treatment.

A different way to transfer anti-specific T-cells against infectious agents was the *ex vivo* enrichment of viral specific T-cells. Expansion of virus specific CD8+ cytotoxic T-cells was challenging with the use of virally infected MHC compatible cells as antigen presenting cells or repeated stimulation with antigen and IL-2 in limiting dilution and maintenance of (CMV specific) T-cell clones with anti-CD3 and anti-CD28 monoclonal antibodies [19]. Expansion of antigen-specific T-cells can be achieved using different techniques, *i.e.* Artificial Antigen-Presenting Cells (aAPC) [20] and second generation aAPC with engineered capabilities of effective antigen presentation, cytokine production, expression of adhesion molecules and micropinocytosis [21]. A different approach to expand antigen-specific T-cells is the use of overlapping synthetic peptides [22]. However, the isolation of these T-cells may take too much time (from expansion to effective transfer), it may not be GMP-conform and it may very well be that T-cell precursors are simply not present in PBMCs from patients. Therefore, a 'hard-copy' of the antigen-specific TCR has been isolated and can be transferred using a retroviral or lentiviral system. This has been successfully achieved for a range of cancer-related targets [23], as well as for infectious pathogens, e.g. HPV [24] or Hepatitis B [25] or EBV [5]. The transfer of antigen-specific TCRs is dependent on the match for the MHC class I or class II-genetic background of the recipient. Of note, cross-reactive T-cells may also cause

harm and target non-pathogen related structures. The clinical relevance of such cross-reactive T-cell responses has recently been demonstrated by the unexpected cross-reactivity of the adoptive transfer of an MAGE-3 directed T-cell product that resulted in a cytokine storm and death of the patient [26].

### **$\gamma\delta$ T-cells in therapy of infectious diseases and cancer**

These V $\delta$ 2neg  $\gamma\delta$  T-cell populations were observed to represent an average of 13.4% in CMV+ patients. Ten years later, a similar pattern was observed in the context of HSCT [27]. V $\delta$ 2neg  $\gamma\delta$  T-cells have been demonstrated to play a role in the immune response to CMV reactivation exhibiting activity against CMV-infected cells. In addition to the anti-CMV activity, V $\delta$ 2neg  $\gamma\delta$  T-cells have been shown to be implicated in tumor defense by cytotoxic activity [28] or directly infiltrating the tumor [29]. The V $\delta$ 2neg  $\gamma\delta$  T-cell population also showed a cross-recognition activity between CMV and cancer [30, 31]; co-incubation of CMV-reactive V $\delta$ 2neg  $\gamma\delta$  T-cells clone with hematological tumor cell lines resulted in CMV-specific T-cell populations that cross-recognized residual leukemia blasts.

### **Bibliography**

1. Einsele H, Roosnek E, Rufer N, et al. Infusion of cytomegalovirus (CMV)-specific T cells for the treatment of CMV infection not responding to antiviral chemotherapy. *Blood* **2002**; 99(11): 3916-22.
2. Rooney CM, Smith CA, Ng CY, et al. Use of gene-modified virus-specific T lymphocytes to control Epstein-Barr-virus-related lymphoproliferation. *Lancet* **1995**; 345(8941): 9-13.
3. Heslop HE, Slobod KS, Pule MA, et al. Long-term outcome of EBV-specific T-cell infusions to prevent or treat EBV-related lymphoproliferative disease in transplant recipients. *Blood* **2010**; 115(5): 925-35.
4. Louis CU, Straathof K, Bollard CM, et al. Adoptive transfer of EBV-specific T cells results in sustained clinical responses in patients with locoregional nasopharyngeal carcinoma. *Journal of immunotherapy* **2010**; 33(9): 983-90.
5. Ricciardelli I, Blundell MP, Brewin J, Thrasher A, Pule M, Amrolia PJ. Towards gene therapy for EBV-associated posttransplant lymphoma with genetically modified EBV-specific cytotoxic T cells. *Blood* **2014**; 124(16): 2514-22.
6. Leen AM, Myers GD, Sili U, et al. Monoculture-derived T lymphocytes specific for multiple viruses expand and produce clinically relevant effects in immunocompromised individuals. *Nat Med* **2006**; 12(10): 1160-6.

7. Leen AM, Bollard CM, Mendizabal AM, et al. Multicenter study of banked third-party virus-specific T cells to treat severe viral infections after hematopoietic stem cell transplantation. *Blood* **2013**; 121(26): 5113-23.
8. Cobbold M, Khan N, Pourgheysari B, et al. Adoptive transfer of cytomegalovirus-specific CTL to stem cell transplant patients after selection by HLA-peptide tetramers. *The Journal of experimental medicine* **2005**; 202(3): 379-86.
9. Neudorfer J, Schmidt B, Huster KM, et al. Reversible HLA multimers (Streptamers) for the isolation of human cytotoxic T lymphocytes functionally active against tumor- and virus-derived antigens. *Journal of immunological methods* **2007**; 320(1-2): 119-31.
10. Schmitt A, Tonn T, Busch DH, et al. Adoptive transfer and selective reconstitution of streptamer-selected cytomegalovirus-specific CD8+ T cells leads to virus clearance in patients after allogeneic peripheral blood stem cell transplantation. *Transfusion* **2011**; 51(3): 591-9.
11. Uhlin M, Gertow J, Uzunel M, et al. Rapid salvage treatment with virus-specific T cells for therapy-resistant disease. *Clin Infect Dis* **2012**; 55(8): 1064-73.
12. Chakupurakal G, Onion D, Bonney S, Cobbold M, Mautner V, Moss P. HLA-peptide multimer selection of adenovirus-specific T cells for adoptive T-cell therapy. *Journal of immunotherapy* **2013**; 36(8): 423-31.
13. Feuchtinger T, Matthes-Martin S, Richard C, et al. Safe adoptive transfer of virus-specific T-cell immunity for the treatment of systemic adenovirus infection after allogeneic stem cell transplantation. *British journal of haematology* **2006**; 134(1): 64-76.
14. Chatziandreu I, Gilmour KC, McNicol AM, et al. Capture and generation of adenovirus specific T cells for adoptive immunotherapy. *British journal of haematology* **2007**; 136(1): 117-26.
15. Qasim W, Gilmour K, Zhan H, et al. Interferon-gamma capture T cell therapy for persistent Adenoviraemia following allogeneic haematopoietic stem cell transplantation. *British journal of haematology* **2013**; 161(3): 449-52.
16. Icheva V, Kayser S, Wolff D, et al. Adoptive transfer of epstein-barr virus (EBV) nuclear antigen 1-specific t cells as treatment for EBV reactivation and lymphoproliferative disorders after allogeneic stem-cell transplantation. *J Clin Oncol* **2013**; 31(1): 39-48.
17. Peggs KS, Thomson K, Samuel E, et al. Directly selected cytomegalovirus-reactive donor T cells confer rapid and safe systemic reconstitution of virus-specific immunity following stem cell transplantation. *Clin Infect Dis* **2011**; 52(1): 49-57.
18. Feuchtinger T, Opherck K, Bethge WA, et al. Adoptive transfer of pp65-specific T cells for the treatment of chemorefractory cytomegalovirus disease or reactivation after haploidentical and matched unrelated stem cell transplantation. *Blood* **2010**; 116(20): 4360-7.
19. Riddell SR, Greenberg PD. The use of anti-CD3 and anti-CD28 monoclonal antibodies to clone and expand human antigen-specific T cells. *Journal of immunological methods* **1990**; 128(2): 189-201.
20. Levine BL, Bernstein WB, Connors M, et al. Effects of CD28 costimulation on long-term proliferation of CD4+ T cells in the absence of exogenous feeder cells. *J Immunol* **1997**; 159(12): 5921-30.
21. Maus MV, Thomas AK, Leonard DG, et al. Ex vivo expansion of polyclonal and antigen-specific cytotoxic T lymphocytes by artificial APCs expressing ligands for the T-cell receptor, CD28 and 4-1BB. *Nat Biotechnol* **2002**; 20(2): 143-8.
22. Melenhorst JJ, Solomon SR, Shenoy A, et al. Robust expansion of viral antigen-specific CD4+ and CD8+ T cells for adoptive T cell therapy using gene-modified activated T cells as antigen presenting cells. *Journal of immunotherapy* **2006**; 29(4): 436-43; discussion 365-6.
23. Yang S, Dudley ME, Rosenberg SA, Morgan RA. A simplified method for the clinical-scale generation of central memory-like CD8+ T cells after transduction with lentiviral vectors encoding antitumor antigen T-cell receptors. *Journal of immunotherapy* **2010**; 33(6): 648-58.
24. Scholten KB, Turksma AW, Ruizendaal JJ, et al. Generating HPV specific T helper cells for the treatment of HPV induced malignancies using TCR gene transfer. *J Transl Med* **2011**; 9: 147.

25. Qasim W, Brunetto M, Gehring AJ, et al. Immunotherapy of HCC metastases with autologous T cell receptor redirected T cells, targeting HBsAg in a liver transplant patient. *J Hepatol* 2015; 62(2): 486-91.
26. Tey SK. Adoptive T-cell therapy: adverse events and safety switches. *Clinical & translational immunology* 2014; 3(6): e17.
27. Knight A, Madrigal AJ, Grace S, et al. The role of Vdelta2-negative gammadelta T cells during cytomegalovirus reactivation in recipients of allogeneic stem cell transplantation. *Blood* 2010; 116(12): 2164-72.
28. Correia DV, Fogli M, Hudspeth K, da Silva MG, Mavilio D, Silva-Santos B. Differentiation of human peripheral blood Vdelta1+ T cells expressing the natural cytotoxicity receptor NKp30 for recognition of lymphoid leukemia cells. *Blood* **2011**; 118(4): 992-1001.
29. Maeurer MJ, Martin D, Walter W, et al. Human intestinal Vdelta1+ lymphocytes recognize tumor cells of epithelial origin. *The Journal of experimental medicine* **1996**; 183(4): 1681-96.
30. Halary F, Pitard V, Dlubek D, et al. Shared reactivity of V{delta}2(neg) {gamma}{delta} T cells against cytomegalovirus-infected cells and tumor intestinal epithelial cells. *The Journal of experimental medicine* **2005**; 201(10): 1567-78.
31. Scheper W, van Dorp S, Kersting S, et al. gammadeltaT cells elicited by CMV reactivation after allo-SCT cross-recognize CMV and leukemia. *Leukemia* **2013**; 27(6): 1328-38.
